# Supplementary material for: pH-dependent 11° F1FO ATP synthase sub-steps reveal insight into the FO torque generating mechanism
Source: eLife journal article supplement (doi:10.7554/elife.70016), 2021-12-31
Supplement: supp [file elife-70016-supp-v1.zip]

## eLife's transparent reporting form

We encourage authors to provide detailed information *within their submission* to facilitate the interpretation and replication of experiments. Authors can upload supporting documentation to indicate the use of appropriate reporting guidelines for health-related research (see [EQUATOR Network](#)), life science research (see the [BioSharing Information Resource](#)), or the [ARRIVE guidelines](#) for reporting work involving animal research. Where applicable, authors should refer to any relevant reporting standards documents in this form.

If you have any questions, please consult our Journal Policies and/or contact us: [editorial@elifesciences.org](mailto:editorial@elifesciences.org).

### Sample-size estimation

- An appropriate sample size was computed when the study was being designed.
- Sample sizes greater than 100,000 were used for almost all measurements presented so that we clearly exceeded any statistical limitations of the measurements.
- Measurements were considered reliable by the size of the standard errors relative to the differences between treatments.

Please outline where this information can be found within the submission (e.g., sections or figure legends), or explain why this information doesn't apply to your submission:

The first paragraph of the results describes the sample sizes used in the measurements and refers to supplementary Fig 3 where the number of molecules examined for each measurement are indicated. The number of power strokes examined far exceeds those presented in other single-molecule publications. We also include standard errors.

### Replicates

- You should report how often each experiment was performed
- You should include a definition of biological versus technical replication
- The data obtained should be provided and sufficient information should be provided to indicate the number of independent biological and/or technical replicates
- If you encountered any outliers, you should describe how these were handled
- Criteria for exclusion/inclusion of data should be clearly stated
- High-throughput sequence data should be uploaded before submission, with a private link for reviewers provided (these are available from both GEO and ArrayExpress)

Please outline where this information can be found within the submission (e.g., sections or figure legends), or explain why this information doesn't apply to your submission:

The first paragraph of the results describes the number of replications. No data were considered outliers. All measurements made were included.

## Statistical reporting

- Statistical analysis methods should be described and justified
- Raw data should be presented in figures whenever informative to do so (typically when N per group is less than 10)
- For each experiment, you should identify the statistical tests used, exact values of N, definitions of center, methods of multiple test correction, and dispersion and precision measures (e.g., mean, median, SD, SEM, confidence intervals; and, for the major substantive results, a measure of effect size (e.g., Pearson's r, Cohen's d)
- Report exact p-values wherever possible alongside the summary statistics and 95% confidence intervals. These should be reported for all key questions and not only when the p-value is less than 0.05.

Please outline where this information can be found within the submission (e.g., sections or figure legends), or explain why this information doesn't apply to your submission:

Standard error of all measurements are shown. Examples of the raw data are shown in Figure 2 and supplementary Fig. 1.

(For large

datasets, or papers with a very large number of statistical tests, you may upload a single table file with tests, Ns, etc., with reference to sections in the manuscript.)

## Group allocation

- Indicate how samples were allocated into experimental groups (in the case of clinical studies, please specify allocation to treatment method); if randomization was used, please also state if restricted randomization was applied
- Indicate if masking was used during group allocation, data collection and/or data analysis

Please outline where this information can be found within the submission (e.g., sections or figure legends), or explain why this information doesn't apply to your submission:

Data of Figs 2, S2 and 3 clearly did not fit to a single Gaussian distribution, and fit well to 3 Gaussians corresponding to the 3 rotational positions of the rotor relative to the stator as described in Results section, "Subunit-a mutations affect TD formation efficiency."

## Additional data files ("source data")

- We encourage you to upload relevant additional data files, such as numerical data that are represented as a graph in a figure, or as a summary table
- Where provided, these should be in the most useful format, and they can be uploaded as "Source data" files linked to a main figure or table
- Include model definition files including the full list of parameters used
- Include code used for data analysis (e.g., R, MatLab)
- Avoid stating that data files are "available upon request"

Please indicate the figures or tables for which source data files have been provided:

Source data files for all figures have been uploaded to DRYAD doi:10.5061/dryad.9cnp5hqhw, and the files are labeled to correspond with each figure and supplementary figure in the manuscript.
